# Supplementary material for: Assessing molecular subtypes of gastric cancer: microsatellite unstable and Epstein-Barr virus subtypes. Methods for detection and clinical and pathological implications
Source: PubMed Central journal article supplement — ESMO Open. 2019 May 27;4(3):e000470. doi: 10.1136/esmoopen-2018-000470 (PMC6555614; doi:10.1136/esmoopen-2018-000470), 2019-05-27
Supplement: esmoopen-2018-000470supp005.pdf [file esmoopen-2018-000470supp005.pdf]

**Table S1:** Immunostaining results and MSI status by PCR.

| <b>MSI status by PCR</b>              | <b>MMR proteins expression</b> |                           |                                          |
|---------------------------------------|--------------------------------|---------------------------|------------------------------------------|
|                                       | <b>MLH1/PMS2 negative</b>      | <b>MSH2/MSH6 negative</b> | <b>MMR<sup>c</sup> proteins positive</b> |
| <b>MSI<sup>a</sup></b><br>n=45 (18%)  | 37 (82.2%)                     | 4 (8.9%)                  | 4 (8.9%)                                 |
| <b>MSS<sup>b</sup></b><br>n=201 (82%) | 3 (1.5%)                       | 1 (0.5%)                  | 197 (98%)                                |

<sup>a</sup>microsatellite unstable, <sup>b</sup>microsatellite stable, <sup>c</sup>mismatched repair.
